# Supplementary material for: Enhanced luminescence and energy transfer in Mn2+ doped CsPbCl3−xBrx perovskite nanocrystals
Source: Royal Society of Chemistry journal article supplement (doi:10.1039/c8nr05492d), 2018-01-01
Supplement: c8nr05492d1.pdf [file c8nr05492d1.pdf]

## Electronic Supplementary Information

### **Enhanced luminescence and energy transfer in Mn<sup>2+</sup> doped CsPbCl<sub>3-x</sub>Br<sub>x</sub> perovskite nanocrystals**

Liling Fei,<sup>a</sup> Xi Yuan,<sup>\*a</sup> Jie Hua,<sup>a</sup> Michio Ikezawa,<sup>b</sup> Ruosheng Zeng,<sup>c</sup> Haibo Li,<sup>a</sup>  
Yasuaki Masumoto,<sup>b</sup> and Jialong Zhao<sup>\*a</sup>

*<sup>a</sup>Key Laboratory of Functional Materials Physics and Chemistry of the Ministry of Education, Jilin Normal University, Siping 136000, China*

*<sup>b</sup>Institute of Physics, University of Tsukuba, Tsukuba 305-8571, Japan*

*<sup>c</sup>School of Life and Environmental Sciences, Guilin University of Electronic Technology, Guilin 541004, China*

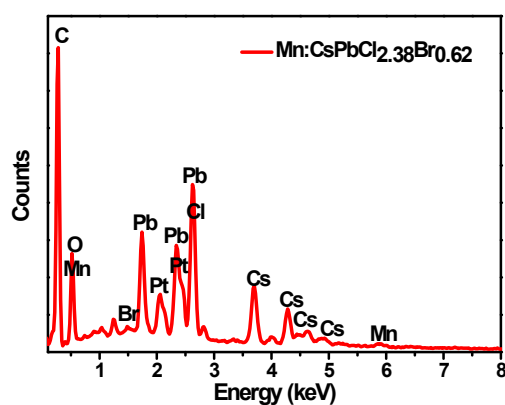

**Fig. S1** The typical EDX spectra of  $\text{Mn}^{2+}:\text{CsPbCl}_{2.38}\text{Br}_{0.62}$  NCs. The atomic ratios of Cl/Br in various  $\text{Mn}^{2+}:\text{CsPbCl}_{3-x}\text{Br}_x$  NCs determined by EDX were summarized in Table S1.

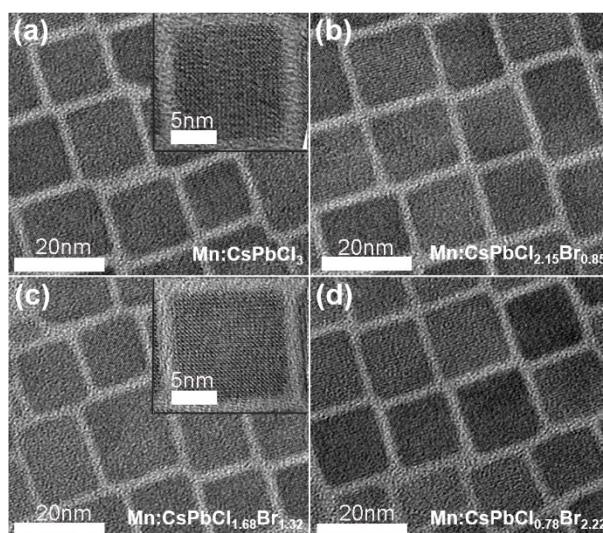

**Fig. S2** Transmission electron microscope (TEM) and high-resolution transmission electron microscopy (HRTEM) images of  $\text{Mn}^{2+}$  doped  $\text{CsPbCl}_3$  (a),  $\text{CsPbCl}_{2.15}\text{Br}_{0.85}$  (b),  $\text{CsPbCl}_{1.68}\text{Br}_{1.32}$  (c),  $\text{CsPbCl}_{0.78}\text{Br}_{2.22}$  (d).

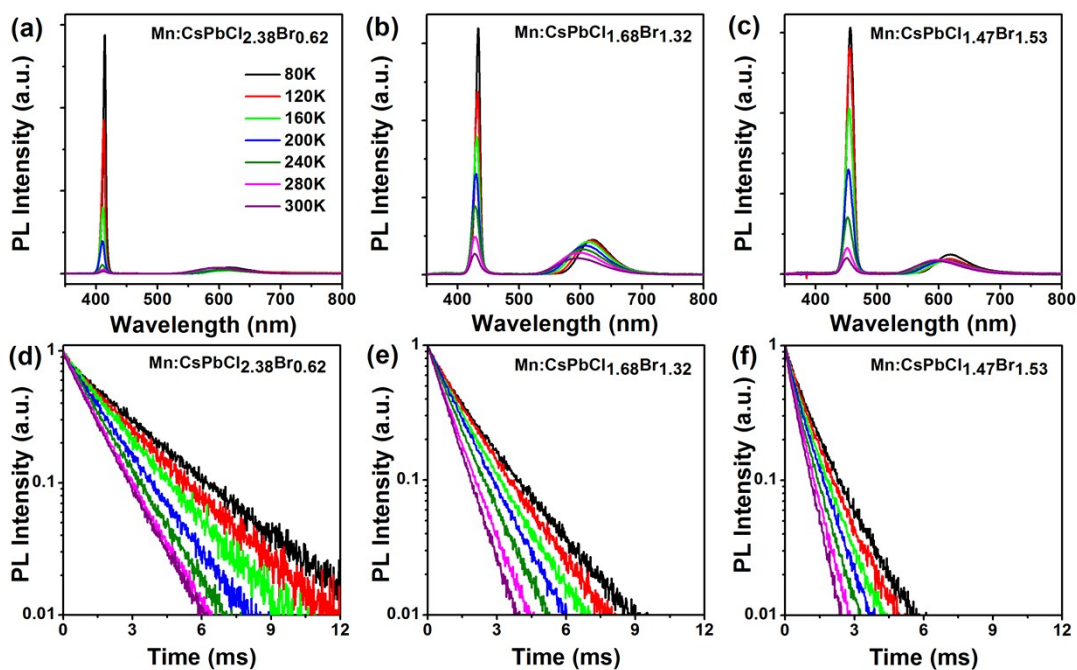

**Fig. S3** Temperature-dependent PL spectra of  $\text{Mn}^{2+}:\text{CsPbCl}_{2.38}\text{Br}_{0.62}$  (a) and  $\text{Mn}^{2+}:\text{CsPbCl}_{1.68}\text{Br}_{1.32}$  (b) and  $\text{Mn}^{2+}:\text{CsPbCl}_{1.47}\text{Br}_{1.53}$  NC films (c). PL decay curves of  $\text{Mn}^{2+}$  in  $\text{Mn}^{2+}:\text{CsPbCl}_{2.38}\text{Br}_{0.62}$  (d) and  $\text{Mn}^{2+}:\text{CsPbCl}_{1.68}\text{Br}_{1.32}$  (e) and  $\text{Mn}^{2+}:\text{CsPbCl}_{1.47}\text{Br}_{1.53}$  NC films (f).

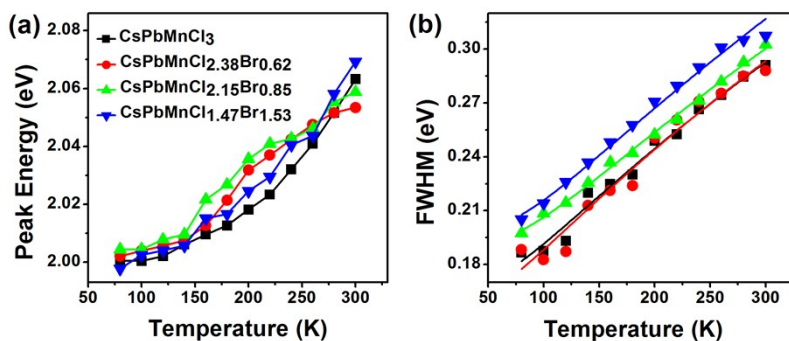

**Fig. S4** Temperature dependent peak energy (a) and linewidth (b) of  $\text{Mn}^{2+}$  emissions in  $\text{Mn}^{2+}:\text{CsPbCl}_{3-x}\text{Br}_x$  NC films.

**Table S1** Atomic ratios of Cl/Br in various  $\text{Mn}^{2+}:\text{CsPbCl}_{3-x}\text{Br}_x$  NCs determined by EDX. The composition x of Br anions was varied by Cl-to-Br anion exchange strategy by adding different volume of  $\text{PbBr}_2$  precursor solution into  $\text{Mn}^{2+}:\text{CsPbCl}_3$  NC solution.

| Volume of $\text{PbBr}_2$ precursor solution | Atomic ratio of Cl/Br | Element composition                                   |
|----------------------------------------------|-----------------------|-------------------------------------------------------|
| 0.2 mL                                       | 3.84                  | $\text{Mn}^{2+}:\text{CsPbCl}_{2.38}\text{Br}_{0.62}$ |
| 0.6 mL                                       | 2.53                  | $\text{Mn}^{2+}:\text{CsPbCl}_{2.15}\text{Br}_{0.85}$ |
| 1.0 mL                                       | 1.27                  | $\text{Mn}^{2+}:\text{CsPbCl}_{1.68}\text{Br}_{1.32}$ |
| 1.6 mL                                       | 0.96                  | $\text{Mn}^{2+}:\text{CsPbCl}_{1.47}\text{Br}_{1.53}$ |
| 2.0 mL                                       | 0.35                  | $\text{Mn}^{2+}:\text{CsPbCl}_{0.78}\text{Br}_{2.22}$ |
| 4.0 mL                                       | 0.12                  | $\text{Mn}^{2+}:\text{CsPbCl}_{0.32}\text{Br}_{2.68}$ |

**Table S2** Analytical  $\text{Mn}^{2+}$  concentrations (relative to  $\text{Pb}^{2+}$  ions) in various  $\text{Mn}^{2+}:\text{CsPbCl}_{3-x}\text{Br}_x$  NCs, determined by ICP-MS.

| Element composition                                   | $\text{Mn}^{2+}$ concentration |
|-------------------------------------------------------|--------------------------------|
| $\text{Mn}^{2+}:\text{CsPbCl}_{2.38}\text{Br}_{0.62}$ | 2.5%                           |
| $\text{Mn}^{2+}:\text{CsPbCl}_{2.15}\text{Br}_{0.85}$ | 2.2%                           |
| $\text{Mn}^{2+}:\text{CsPbCl}_{1.68}\text{Br}_{1.32}$ | 2.5%                           |
| $\text{Mn}^{2+}:\text{CsPbCl}_{1.47}\text{Br}_{1.53}$ | 2.9%                           |
| $\text{Mn}^{2+}:\text{CsPbCl}_{0.78}\text{Br}_{2.22}$ | 2.8%                           |
| $\text{Mn}^{2+}:\text{CsPbCl}_{0.32}\text{Br}_{2.68}$ | 2.2%                           |
